# Supplementary material for: Differential retention contributes to racial/ethnic disparity in U.S. academia
Source: PubMed Central journal article supplement (PMC8635368; doi:10.1371/journal.pone.0259710), 2021-12-01
Supplement: pone.0259710.s010.pdf [file pone.0259710.s010.pdf]

**S1 Table.** Data used for our model structure, years of data, and NSF report sources.

| DATA                     | YEARS                  | SOURCES                                                            |
|--------------------------|------------------------|--------------------------------------------------------------------|
| DEGREES, $D_i(t)$        |                        |                                                                    |
| # Bachelors degrees      | 1966-2012<br>2006–2016 | S&E Degrees, 2015 report, Table 5<br>WMPD, 2019 report, Table 7-4  |
| # PhD degrees            | 1966-2012<br>2006–2016 | S&E Degrees, 2015 report, Table 19<br>WMPD, 2019 report, Table 5-3 |
| STAGE SIZE, $N_i(t)$     |                        |                                                                    |
| # graduate students      | 1975-2018              | GSPD, 2018 report, Tables 1-9a, 1-10a                              |
| postdoctoral researchers | 1975-2018              | GSPD, 2018 report, Tables 1-9b, 1-10b                              |
| assistant professors     | 1973-2017              | SE-ind, 2019 report, Table S3-7                                    |
| tenured professors       | 1973-2017              | SE-ind, 2019 report, Table S3-7                                    |
| TIME IN STAGE, $\tau_i$  |                        |                                                                    |
| graduate student         | 6.8 yrs                | SE-ind, 2018 report, Table 2-30, 2015 data                         |
| postdoc                  | 2*1.9 yrs              | [08-307] 2008 report, Table 2, 2006 data                           |
| assistant professor      |                        | 5-8 yrs                                                            |
| tenured professor        |                        | 20-30 yrs                                                          |
