# Supplementary material for: Differential retention contributes to racial/ethnic disparity in U.S. academia
Source: PubMed Central journal article supplement (PMC8635368; doi:10.1371/journal.pone.0259710), 2021-12-01
Supplement: pone.0259710.s012.pdf [file pone.0259710.s012.pdf]

**S3 Table.** Model variables, parameters, meaning and sources.

| PARAMETER      | MEANING                                                                                       | SOURCE       |
|----------------|-----------------------------------------------------------------------------------------------|--------------|
| $t$            | time (year)                                                                                   | NA           |
| $i$            | stage ( $U,G,P,A,T$ )                                                                         | NA           |
| $k$            | individual race/ethnicity                                                                     | NA           |
| $N_i(t)$       | number of individuals in stage $i$ in year $t$                                                | see Table S1 |
| $D_i(t)$       | number of degrees of stage $i$ awarded in year $t$ (only $i=U,G$ )                            | see Table S1 |
| $R(t)$         | fraction of PhD degrees to U.S. citizens / permanent residents in year $t$                    | see Table S2 |
| $V(t,k)$       | fraction of U.S. temporary resident PhD recipients in year $t$ that are of race/ethnicity $k$ | see Table S2 |
| $\tau_i$       | average number of years spent in stage $i$                                                    | see Table S1 |
| $\rho_i(t)$    | number of individuals potentially leaving stage $i$ in year $t$                               | estimated    |
| $\omega_i(t)$  | number of openings available in stage $i$ in year $t$                                         | estimated    |
| $\mu_i(t)$     | individuals moving from stage $i$ to stage $i+1$ in year $t$                                  | estimated    |
| $\lambda_i(t)$ | individuals moving from stage $i$ to outside the system in year $t$                           | estimated    |
| $\delta_G(t)$  | individuals leaving stage $G$ (before degree) in year $t$                                     | estimated    |
| $\beta_i(t,j)$ | individuals moving from sub-partition $j$ in stage $i$ in year $t$                            | estimated    |
| $n_i(t,k)$     | number of $k$ individuals in stage $i$ in year $t$                                            | simulated    |
| $f_i(t,k)$     | fraction of individuals in stage $i$ in year $t$ of race/ethnicity $k$                        | simulated    |
