# Supplementary material for: Differential retention contributes to racial/ethnic disparity in U.S. academia
Source: PubMed Central journal article supplement (PMC8635368; doi:10.1371/journal.pone.0259710), 2021-12-01
Supplement: pone.0259710.s013.pdf [file pone.0259710.s013.pdf]

**S4 Table.** The fraction of individuals at each stage of each race/ethnicity in the year 2016. ‘Data’ rows are smoothed NSF counts data and the census data. The remaining rows are what the model predicts (under null model of no bias) for four scenarios: ‘fast-demand’, ‘fast-supply’, ‘slow-demand’, and ‘slow-supply’ which are combinations of a ‘demand’ or ‘supply’ view of faculty turnover and a ‘fast’ ( $\tau_A = 5$ ,  $\tau_T = 20$ ) or ‘slow’ turnover ( $\tau_A = 8$ ,  $\tau_T = 30$ ).

|                                  | Asian  | Black & African American | Native Hawaiian & Pacific Islander | Hispanic & Latino | American Indian & Alaskan Native | White  | More than one race |
|----------------------------------|--------|--------------------------|------------------------------------|-------------------|----------------------------------|--------|--------------------|
| U.S. general population (census) |        |                          |                                    |                   |                                  |        |                    |
| data                             | 0.0602 | 0.1305                   | 0.0018                             | 0.1779            | 0.0084                           | 0.6230 | 0.0209             |
| Undergraduate Students           |        |                          |                                    |                   |                                  |        |                    |
| data                             | 0.1007 | 0.0906                   | 0.0026                             | 0.1345            | 0.0051                           | 0.6327 | 0.03388            |
| Graduate Students                |        |                          |                                    |                   |                                  |        |                    |
| data                             | 0.0973 | 0.0856                   | 0.0025                             | 0.1047            | 0.0056                           | 0.6765 | 0.0278             |
| fast-demand                      | 0.0988 | 0.0903                   | 0.0027                             | 0.1062            | 0.0064                           | 0.6707 | 0.0251             |
| fast-supply                      | 0.0988 | 0.0903                   | 0.0027                             | 0.1062            | 0.0064                           | 0.6707 | 0.0251             |
| slow-demand                      | 0.0988 | 0.0903                   | 0.0027                             | 0.1062            | 0.0064                           | 0.6707 | 0.0251             |
| slow- supply                     | 0.0988 | 0.0903                   | 0.0027                             | 0.1062            | 0.0064                           | 0.6707 | 0.0251             |
| Postdoctoral Researchers         |        |                          |                                    |                   |                                  |        |                    |
| data                             | 0.2082 | 0.0378                   | 0.0030                             | 0.0610            | 0.0040                           | 0.6662 | 0.0198             |
| fast-demand                      | 0.2812 | 0.0698                   | 0.0023                             | 0.0779            | 0.0049                           | 0.5486 | 0.0153             |
| fast-supply                      | 0.2807 | 0.0698                   | 0.0024                             | 0.0776            | 0.0049                           | 0.5495 | 0.0151             |
| slow-demand                      | 0.2799 | 0.0696                   | 0.0025                             | 0.0772            | 0.0049                           | 0.5510 | 0.0148             |
| slow- supply                     | 0.2798 | 0.0696                   | 0.0025                             | 0.0772            | 0.0049                           | 0.5513 | 0.0148             |
| Assistant Professors             |        |                          |                                    |                   |                                  |        |                    |
| data                             | 0.2230 | 0.0392                   | 0.0013                             | 0.0571            | 0.0022                           | 0.6604 | 0.0167             |
| fast-demand                      | 0.2648 | 0.0663                   | 0.0033                             | 0.0700            | 0.0047                           | 0.5774 | 0.0135             |
| fast-supply                      | 0.2635 | 0.0660                   | 0.0034                             | 0.0695            | 0.0047                           | 0.5795 | 0.0135             |
| slow-demand                      | 0.2525 | 0.0641                   | 0.0033                             | 0.0665            | 0.0045                           | 0.5953 | 0.0137             |
| slow- supply                     | 0.2468 | 0.0632                   | 0.0033                             | 0.0649            | 0.0044                           | 0.6034 | 0.0140             |
| Tenured Professors               |        |                          |                                    |                   |                                  |        |                    |
| data                             | 0.1537 | 0.0354                   | 0.0006                             | 0.0422            | 0.0022                           | 0.7548 | 0.0111             |
| fast-demand                      | 0.2053 | 0.0553                   | 0.0015                             | 0.0527            | 0.0037                           | 0.6690 | 0.0124             |
| fast-supply                      | 0.2110 | 0.0564                   | 0.0016                             | 0.0542            | 0.0038                           | 0.6604 | 0.0125             |
| slow-demand                      | 0.1663 | 0.0493                   | 0.0012                             | 0.0441            | 0.0033                           | 0.7235 | 0.0124             |
| slow- supply                     | 0.1599 | 0.0487                   | 0.0011                             | 0.0432            | 0.0032                           | 0.7315 | 0.0123             |
