# Supplementary material for: Differential retention contributes to racial/ethnic disparity in U.S. academia
Source: PubMed Central journal article supplement (PMC8635368; doi:10.1371/journal.pone.0259710), 2021-12-01
Supplement: pone.0259710.s017.pdf [file pone.0259710.s017.pdf]

Supplementary File S4 for

**Differential retention contributes to racial/ethnic disparity in U.S. academia**

Allison K. Shaw<sup>1\*</sup>, Chiara Accolla<sup>1</sup>, Jeremy M. Chacón<sup>1</sup>, Taryn L. Mueller<sup>1</sup>,  
Maxime Vaugeois<sup>1</sup>, Ya Yang<sup>2</sup>, Nitin Sekar<sup>3</sup>, Daniel E. Stanton<sup>1</sup>

<sup>1</sup>Department of Ecology, Evolution and Behavior, University of Minnesota-Twin Cities,  
Saint Paul, MN 55108

<sup>2</sup>Department of Plant and Microbial Biology, University of Minnesota-Twin Cities, Saint  
Paul, MN 55108

<sup>3</sup>Wildlife and Habitats Division, WWF India, New Delhi, Delhi 110003, India \*To whom  
correspondence should be addressed; E-mail: ashaw@umn.edu.

## Data Report Details

Below are details of each data source used.

[08-307] NSF Publication 08-307. 2008 National Science Foundation, Division of Science Resources Statistics, Postdoc Participation of Science, Engineering, and Health Doctorate Recipients. (<http://www.nsf.gov/statistics/infbrief/nsf08307>)

2008 report, Table 2: Median duration of most recently completed postdoc

[GSPD] Survey of Graduate Students and Postdoctorates in Science and Engineering. (<https://www.nsf.gov/statistics/srvygradpostdoc/>)

2018 report, Table 1-9a: number of graduate students by science field for 1975–2018

2018 report, Table 1-10a: number of graduate students by engineering field for 1975–2018

2018 report, Table 1-9b: number of postdoctoral researchers by science field for 1975–2018

2018 report, Table 1-10b: number of postdoctoral researchers by engineering field for 1975–2018

2010 report, Table 34: postdoctoral researchers, by race/ethnicity for 2010

2016 report, Table 34: postdoctoral researchers, by race/ethnicity for 2011-2016

2017 report, Table 2-2: postdoctoral researchers, by race/ethnicity for 2017

2018 report, Table 2-2: postdoctoral researchers, by race/ethnicity for 2018

[S&E Degrees] Science and Engineering Degrees: 1966–2012.

(<https://www.nsf.gov/statistics/2015/nsf15326/>)

2015 report, Table 5: number of bachelor's degrees by field for 1966-2012

2015 report, Table 19: number of PhD degrees by field for 1966-2012

[SED] Survey of Earned Doctorates.

(<https://www.nsf.gov/statistics/srvydoctorates/>)

2014 report, Table 17: doctorate recipients, by broad field of study and citizenship for 1984-2014 (every 5 years)

2015 report, Table 17: doctorate recipients, by broad field of study and citizenship for 1985-2015 (every 5 years)

2016 report, Table 17: doctorate recipients, by broad field of study and citizenship for 1986-2016 (every 5 years)

2017 report, Table 17: doctorate recipients, by broad field of study and citizenship for 1987-2017 (every 5 years)

2018 report, Table 17: doctorate recipients, by broad field of study and citizenship for 1988-2018 (every 5 years)

2010 report, Table 19: doctorate recipients, by race/ethnicity and citizenship for 2000–2010

2018 report, Table 19: doctorate recipients, by race/ethnicity and citizenship for 2009–2018

[SE-ind] Science and Engineering Indicators, National Science Board.

(<https://nces.nsf.gov/indicators>)

2019 report, Table S3-7: number of assistant and tenured professors by field for 1973-2017

2018 report, Table 2-3: median time to degree by field for 1985-2015

[WMPD] Women, Minorities, and Persons with Disabilities in Science and Engineering report.

(<https://www.nsf.gov/statistics/women/>)

2019 report, Table 5-3: number of bachelor's degrees by field for 2006-2016

2019 report, Table 7-4: number of PhD degrees by field for 2006–2016

1994 report, Table 5-19: bachelors degrees by race/ethnicity for 1981-1991

2002 report, Table 3-8: bachelors degrees by race/ethnicity for 1990-1998

2009 report, Table C6: bachelors degrees by race/ethnicity for 1996-2007

2019 report, Table 5-3: bachelors degrees by race/ethnicity for 2006-2016

2002 report, Table 4-6: graduate students by race/ethnicity for 1990-1999

2009 report, Table D-1: graduate students by race/ethnicity for 1999-2006

2011 report, Table 3-1: graduate students by race/ethnicity for 2008-2010

2013 report, Table 3-1: graduate students by race/ethnicity for 2012

2017 report, Table 3-1: graduate students by race/ethnicity for 2014

2019 report, Table 3-1: graduate students by race/ethnicity for 2016

1994 report, Table 8-11: PhD workforce by race/ethnicity and citizenship for 1991

1996 report, Table 5-33: PhD workforce by race/ethnicity and citizenship for 1993

1994 report, Table 8-18: faculty by race/ethnicity for 1991

1996 report, Table 5-28: faculty by race/ethnicity for 1993

1998 report, Table 5-10: faculty by race/ethnicity for 1995

2000 report, Table 5-19: faculty by race/ethnicity for 1997

2004 report, Table H-26: faculty by race/ethnicity for 2001

2007 report, Table H-28: faculty by race/ethnicity for 2003

2009 report, Table H-28: faculty by race/ethnicity for 2006

2011 report, Table 9-26: faculty by race/ethnicity for 2008

2013 report, Table 9-26: faculty by race/ethnicity for 2010  
2015 report, Table 9-26: faculty by race/ethnicity for 2013  
2017 report, Table 9-26: faculty by race/ethnicity for 2015  
2019 report, Table 9-26: faculty by race/ethnicity for 2017
